# Supplementary material for: Rhodium-Based Catalysts: An Impact of the Support Nature on the Catalytic Cyclohexane Ring Opening
Source: MDPI journal article supplement (doi:10.3390/nano13050936), 2023-03-04
Supplement: s1 [file s1]

*Supporting information for the article*

# Rhodium-Based Catalysts: An Impact of the Support Nature on the Catalytic Cyclohexane Ring Opening

Kristina E. Kartavova <sup>1,2</sup>, Mikhail Yu. Mashkin <sup>1,2,3</sup>, Mikhail Yu. Kostin <sup>1</sup>, Elena D. Finashina <sup>3</sup>, Konstantin B. Kalmykov <sup>1</sup>, Gennady I. Kapustin <sup>3</sup>, Petr V. Pribytkov <sup>1,3</sup>, Olga P. Tkachenko <sup>3</sup>, Igor V. Mishin <sup>3</sup>, Leonid M. Kustov <sup>1,2,3,\*</sup> and Alexander L. Kustov <sup>1,2,3</sup>

<sup>1</sup> Department of Chemistry, Lomonosov Moscow State University, 119991 Moscow, Russia

<sup>2</sup> Institute of Ecotechnologies, National University of Science and Technology "MISiS", 119049 Moscow, Russia

<sup>3</sup> N.D. Zelinsky Institute of Organic Chemistry RAS, 119991 Moscow, Russia

\* Correspondence: lmkustov@mail.ru

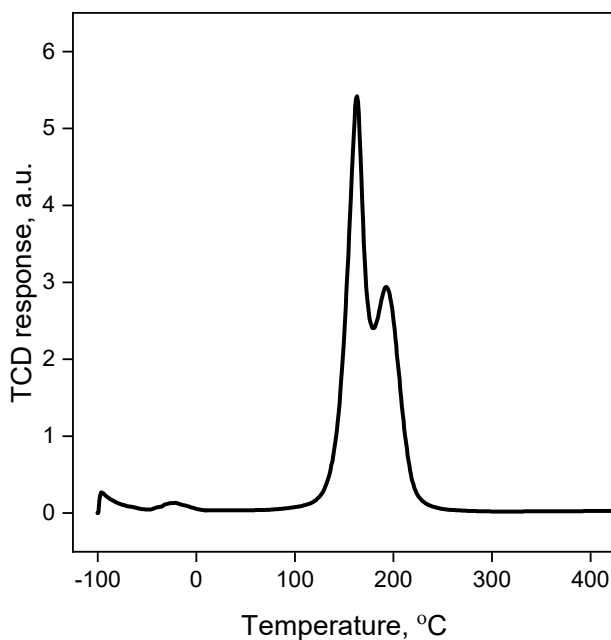

**Figure S1.** TPR-H<sub>2</sub> profile of the sample 9%Rh/SiO<sub>2</sub>(Acros).

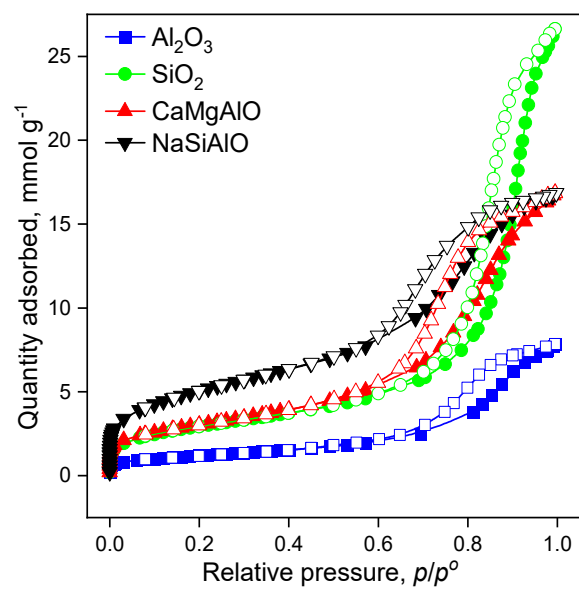

**Figure S2.** Isotherms of N<sub>2</sub> low-temperature adsorption-desorption.

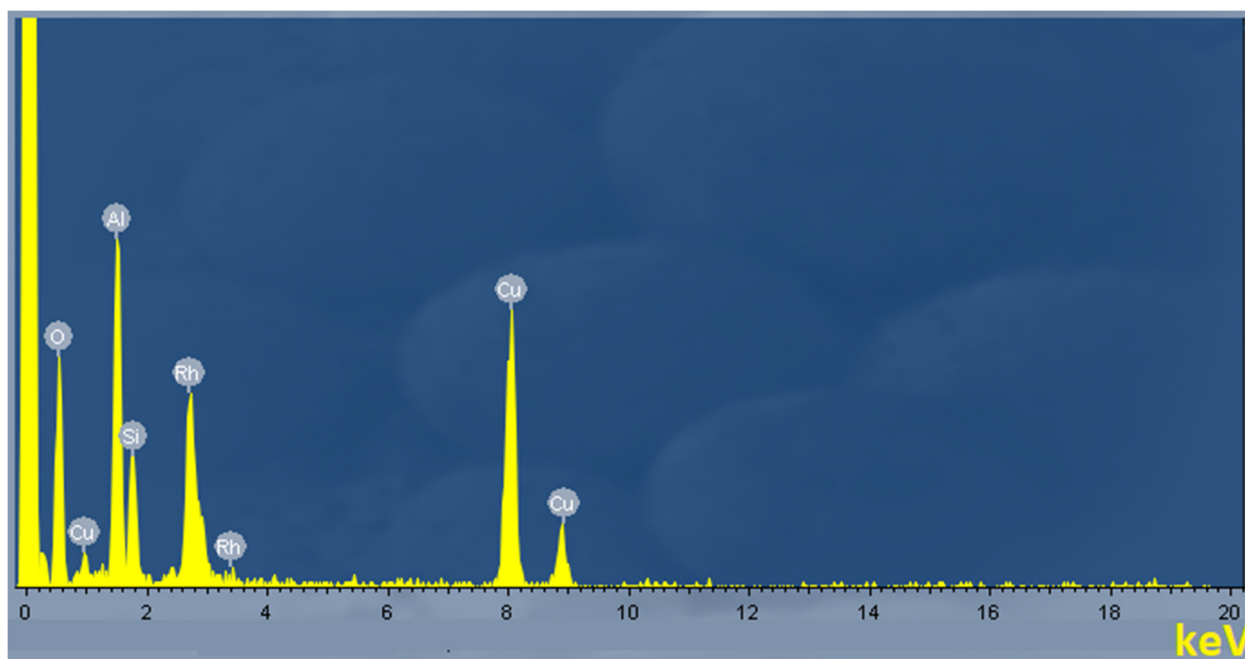

**Figure S3.** EDX spectrum for the sample 1Rh/NaSiAlO (from TEM characterization).

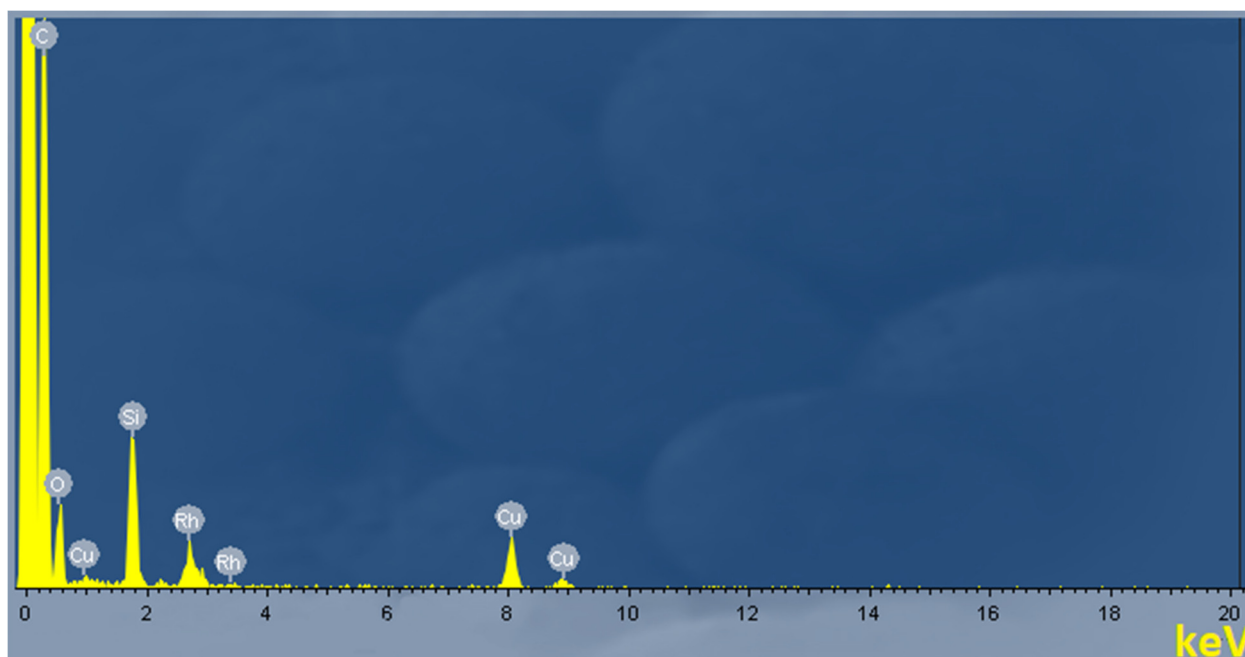

**Figure S4.** EDX spectrum for the sample 1Rh/SiO<sub>2</sub> (from TEM characterization).

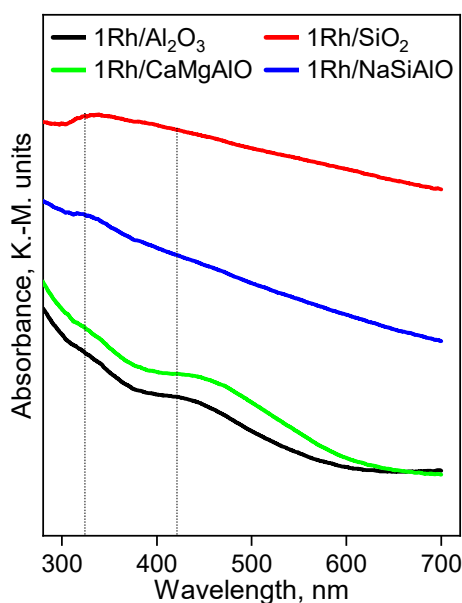

**Figure S5.** UV-visible diffuse reflectance spectra of rhodium-loaded catalysts after calcination under air atmosphere. The dashed lines demonstrate the positions of allowed transitions of supported Rh<sup>3+</sup> <sup>24-26</sup>.

The optical properties of the samples were examined by UV-visible diffuse reflectance spectroscopy. The difference between the samples is clear: the samples demonstrate a decrease in the absorbance in the following row: 1Rh/SiO<sub>2</sub> > 1Rh/NaSiAlO > 1Rh/CaMgAlO > 1Rh/Al<sub>2</sub>O<sub>3</sub>.

Two bands with maxima at about 410 and 320 nm correspond to Rh<sup>3+</sup> species on the alumina support according to the literature <sup>24-26</sup>. Additionally, a charge transfer band can be seen at about 250 nm.

**Table S1.** The EDX results for non-reduced catalysts: (a) 1Rh/NaSiAlO, (b) 1Rh/CaMgAlO, (c) 1Rh/SiO<sub>2</sub>, (d) 1Rh/Al<sub>2</sub>O<sub>3</sub>.

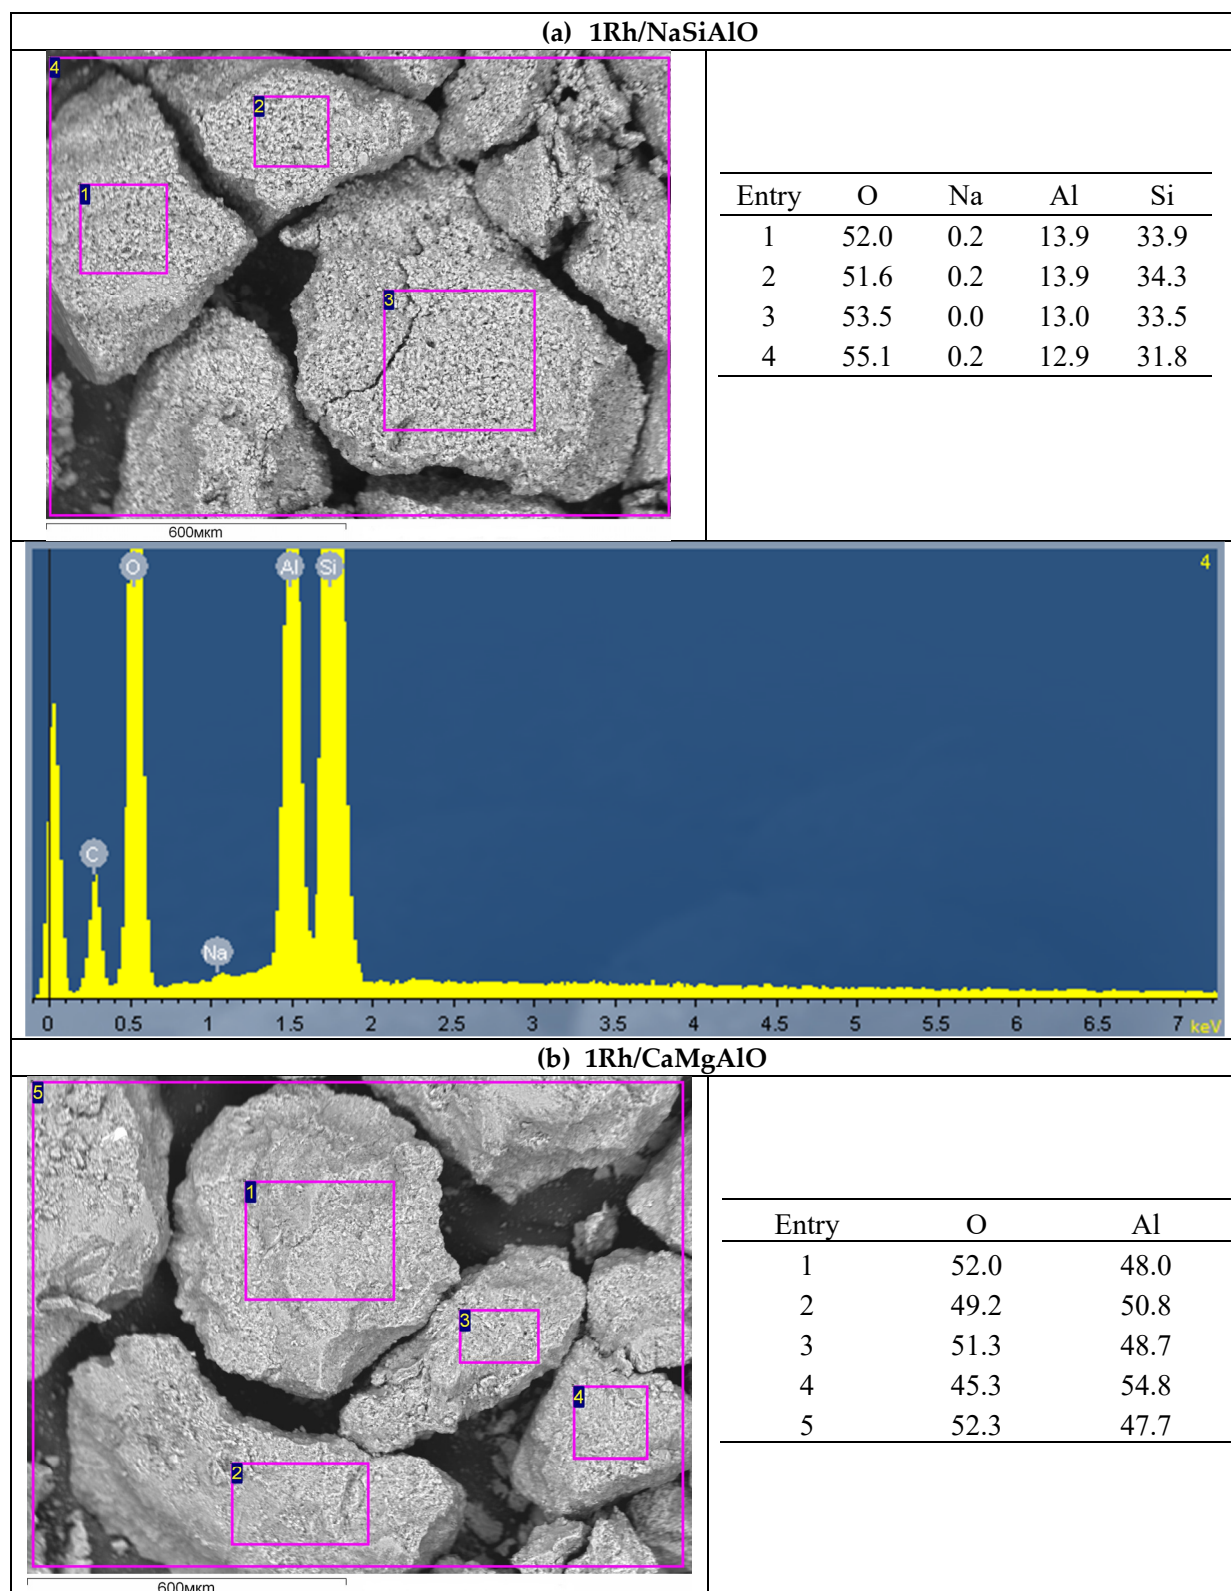

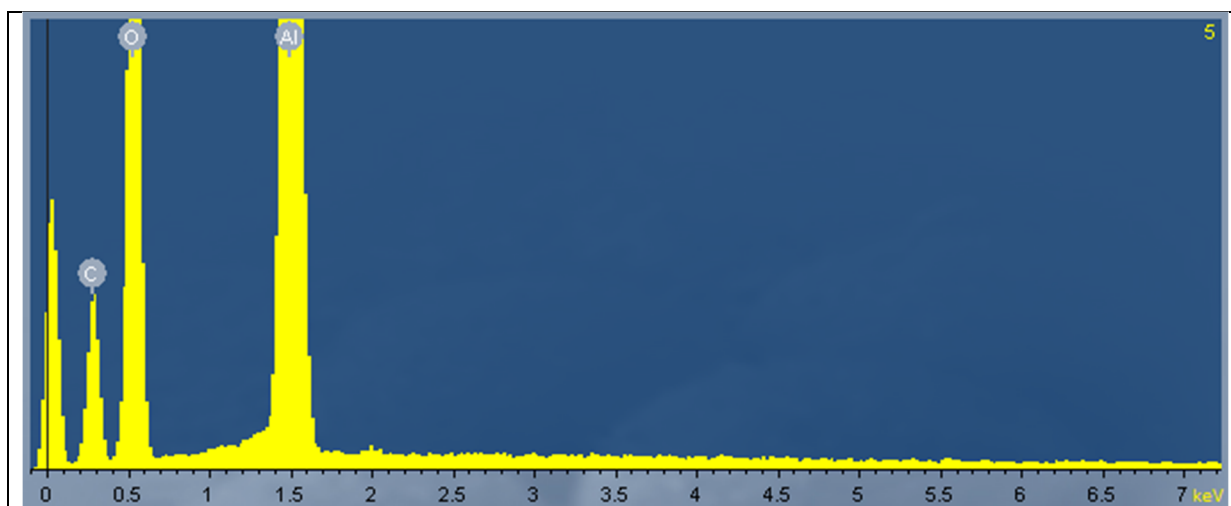

(c) 1Rh/SiO<sub>2</sub>

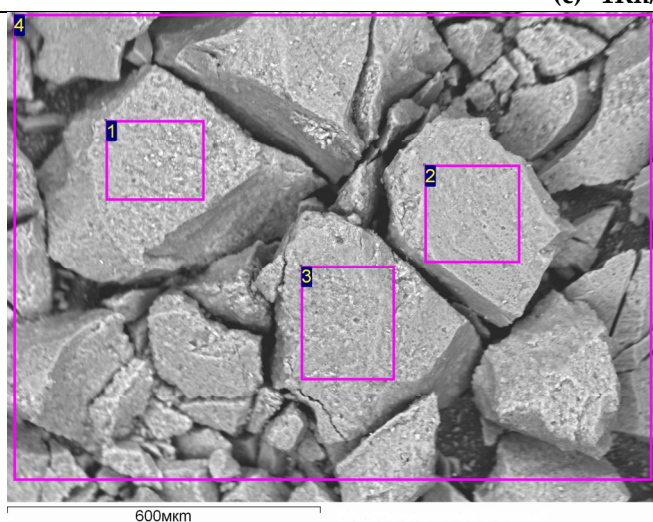

| Entry | O    | Si   |
|-------|------|------|
| 1     | 51.3 | 48.7 |
| 2     | 55.2 | 44.8 |
| 3     | 51.6 | 48.4 |
| 4     | 54.1 | 45.9 |

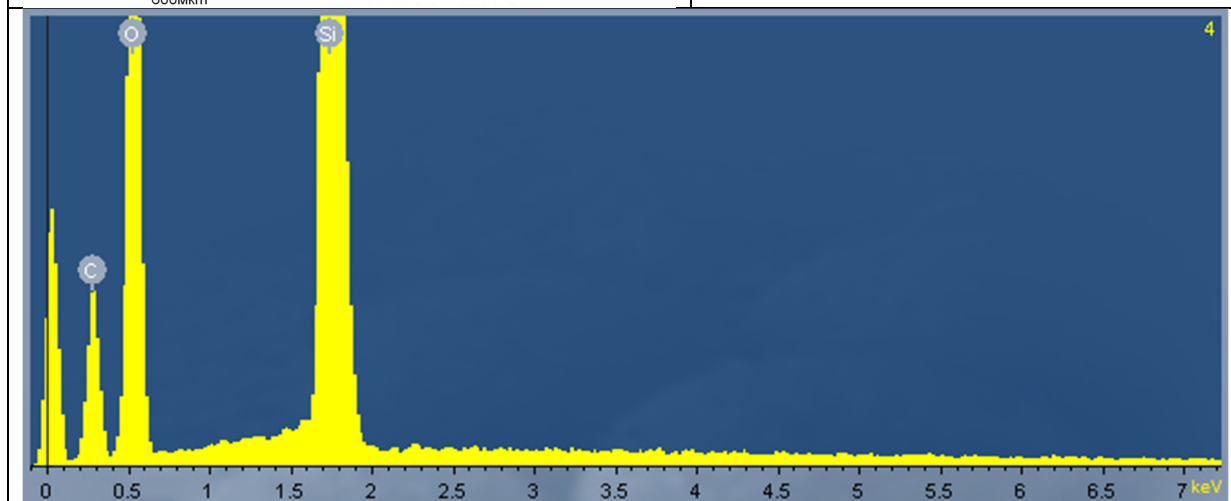

(d) 1Rh/Al<sub>2</sub>O<sub>3</sub>

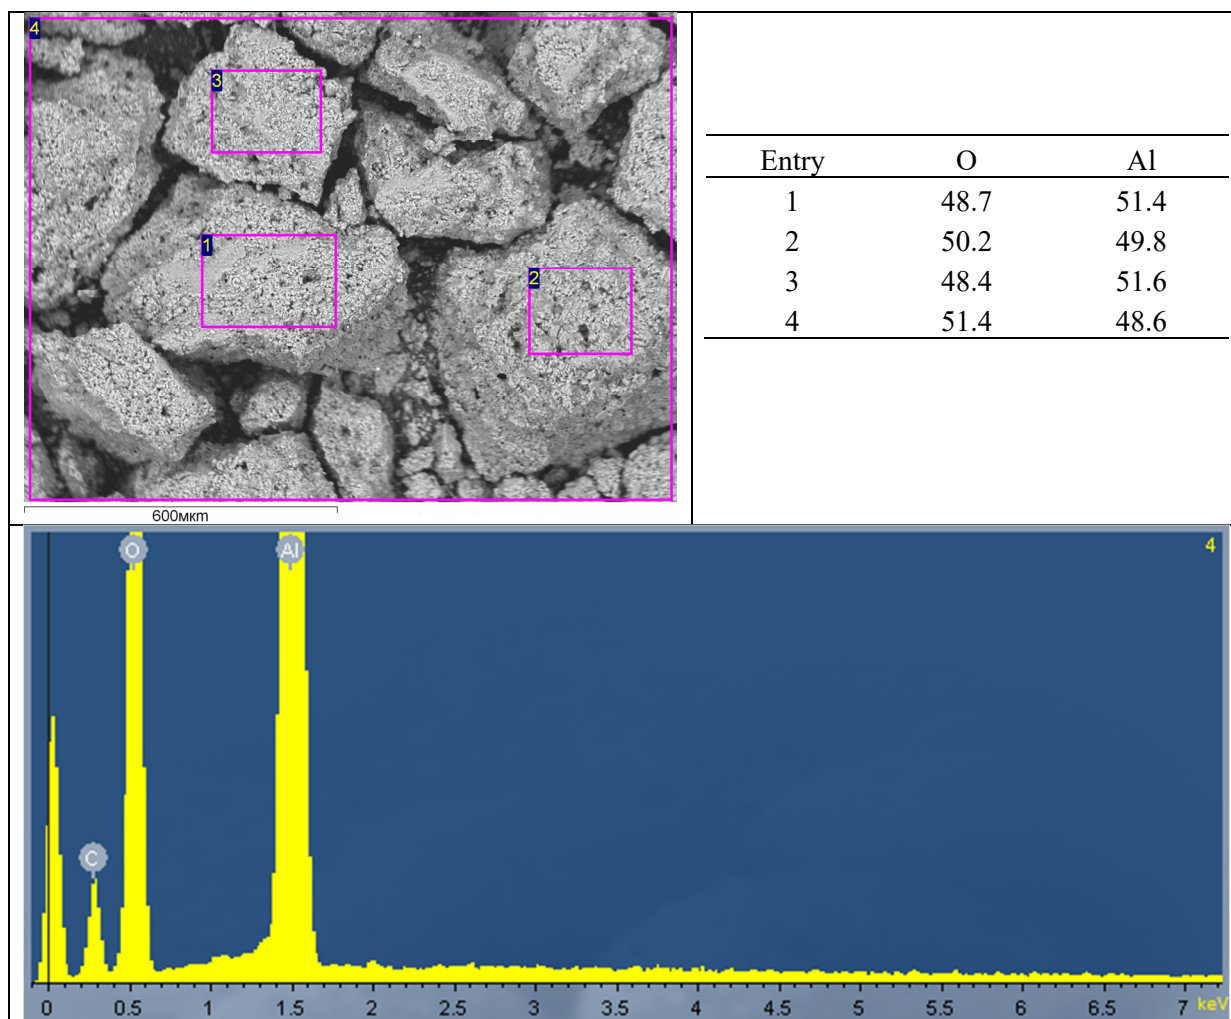

**Table S2.** The results of catalytic tests in the cyclohexane ring opening reaction under the pressure of 40 atm. The feed mixture consisted of 0.0170 ml of cyclohexane (liquid, further vaporized) per minute and H<sub>2</sub> (gas) flow of 50 ml per minute.

| Sample                              | T, °C | Conversion of cyclo-C6, % | Selectivity to <i>n</i> -C6, % | Selectivity to C1–C5, % |
|-------------------------------------|-------|---------------------------|--------------------------------|-------------------------|
| 1%Rh/Al <sub>2</sub> O <sub>3</sub> | 275   | 7.1                       | 61.2                           | 38.5                    |
|                                     | 300   | 14.7                      | 54.5                           | 45.5                    |
|                                     | 325   | 34.6                      | 48.2                           | 51.3                    |
| 1%Rh/CaMgAlO                        | 275   | 24.6                      | 73.5                           | 25.9                    |
|                                     | 300   | 51.5                      | 24.0                           | 75.1                    |
|                                     | 325   | 62.7                      | 10.9                           | 88.3                    |
| 1%Rh/SiO <sub>2</sub>               | 275   | 9.8                       | 57.1                           | 41.6                    |
|                                     | 300   | 10.9                      | 57.9                           | 40.9                    |
|                                     | 325   | 34.7                      | 37.3                           | 61.6                    |
| 1%Rh/NaSiAlO                        | 275   | 5.9                       | 61.8                           | 36.5                    |
|                                     | 300   | 9.7                       | 55.2                           | 42.8                    |
|                                     | 325   | 39.6                      | 43.1                           | 54.2                    |
